# Supplementary material for: Population genomics and morphological features underlying the adaptive evolution of the eastern honey bee (Apis cerana)
Source: PubMed Central journal article supplement (PMC6858728; doi:10.1186/s12864-019-6246-4), 2019-11-15

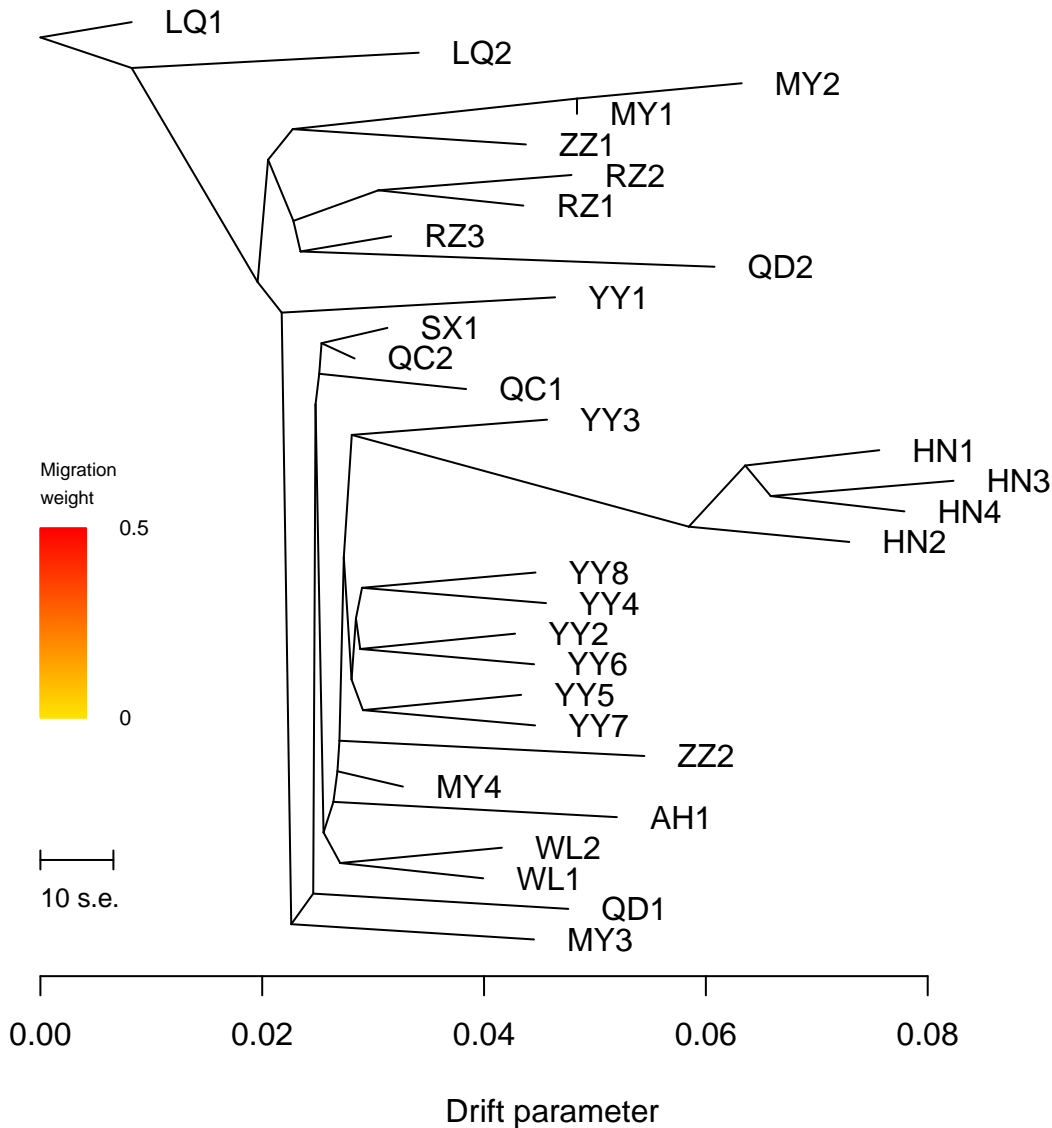

Supplement: 12864_2019_6246_MOESM1_ESM.pdf [file 12864_2019_6246_MOESM1_ESM.pdf]
